# Supplementary material
Source: Springer Nature journal article supplement (https://www.springermedizin.de/resource/supplementary/12933_2009_177_MOESM6_ESM.pdf/9539764)

**A**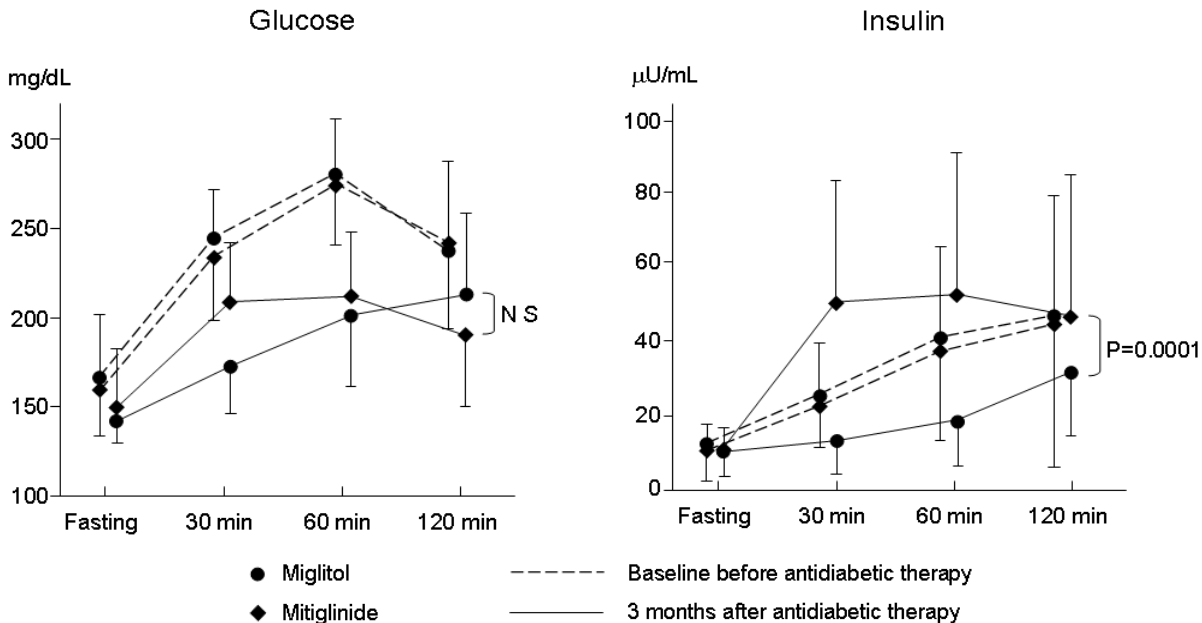**B**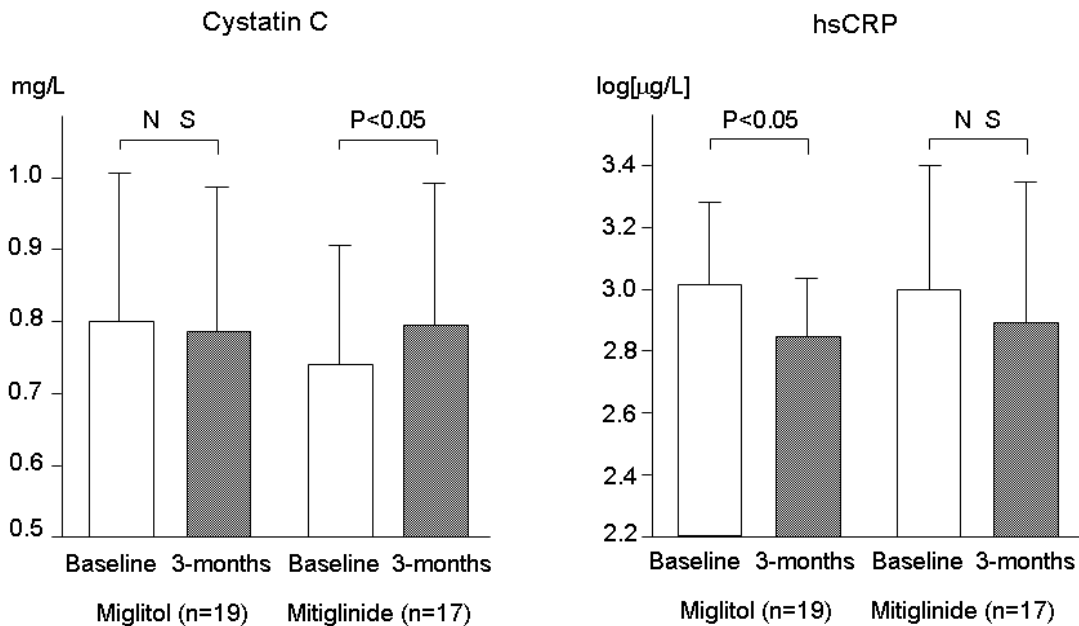

Supplement: MOESM6 [file 9539764]
